# Supplementary material for: The Reflectance Characteristics of an Inverse Moth-Eye Structure in a Silicon Substrate Depending on SF6/O2 Plasma Etching Conditions
Source: MDPI journal article supplement (doi:10.3390/mi13101556), 2022-09-20
Supplement: s1 [file s1]

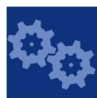

*Supplementary Materials*

# **The reflectance characteristics of an inverse moth-eye structure in a silicon substrate depending on SF<sub>6</sub>/O<sub>2</sub> plasma etching conditions**

**Jong-Chang Woo <sup>1</sup>, Doo-Seung Um <sup>2,\*</sup>**

<sup>1</sup> Department of Semiconductor Process Equipment, Semiconductor Convergence Campus of Korea Polytechnic, 41-12, Songwon-gil, Gongdo-eup, Anseong-si, Gyeonggi-do 17550, Republic of Korea

<sup>2</sup> Department of Electrical Engineering, Sejong University, Seoul 05006, Republic of Korea

\* Correspondence: dsum@sejong.ac.kr (D. S. U.)

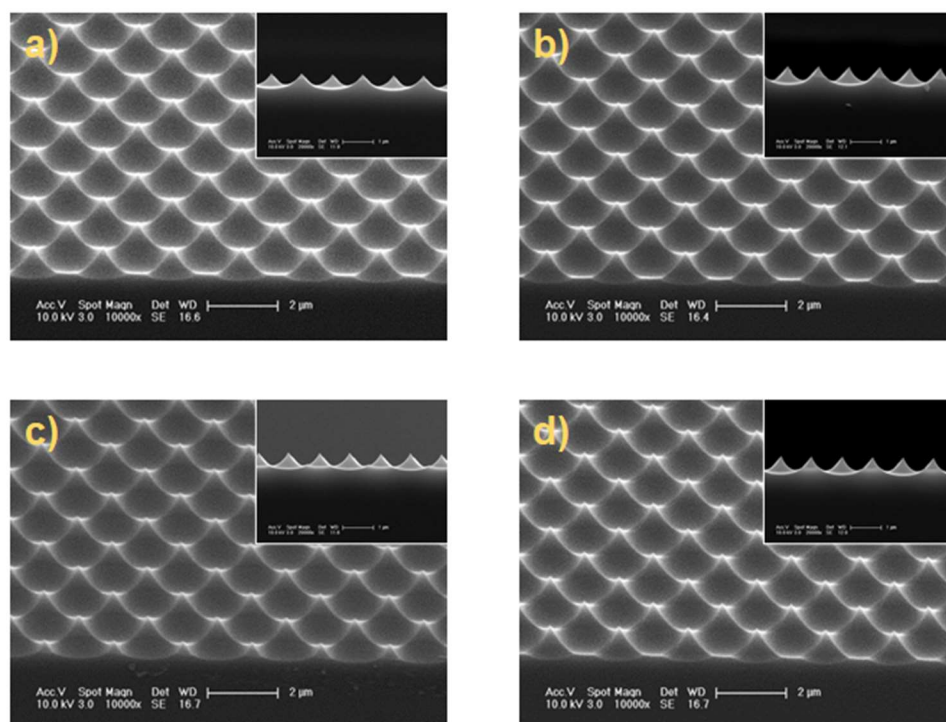

**Figure S1.** SEM images of an inverse moth-eye microstructure according to O<sub>2</sub> gas addition; (a) 0 sccm, (b) 10 sccm, (c) 20 sccm and (d) 30 sccm

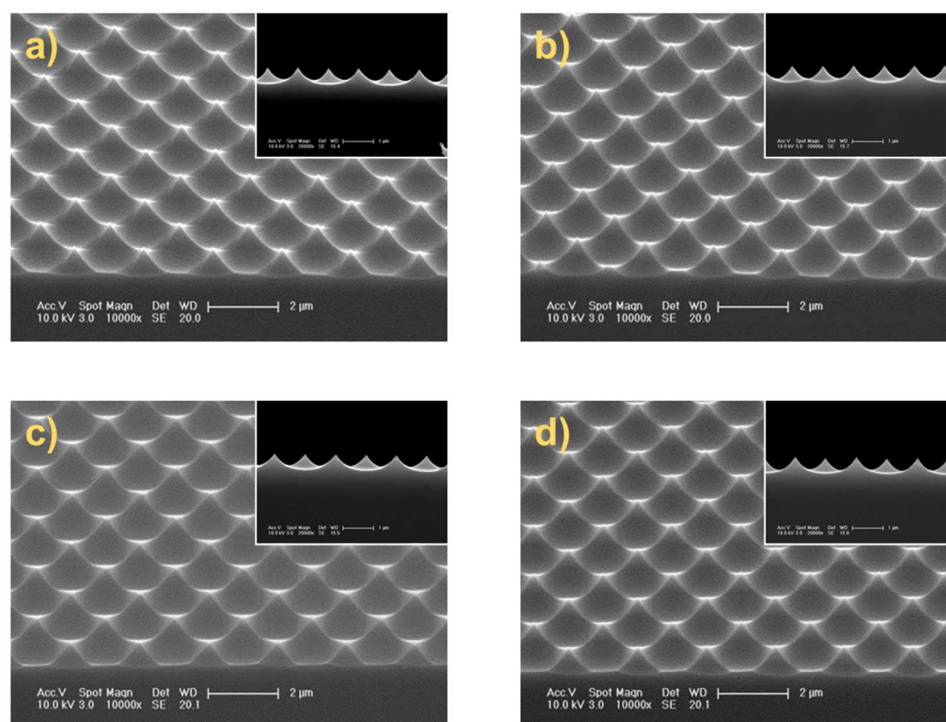

**Figure S2.** SEM images of an inverse moth-eye microstructure according to upper RF power; (a) 750 W, (b) 800 W, (c) 900 W and (d) 950 W

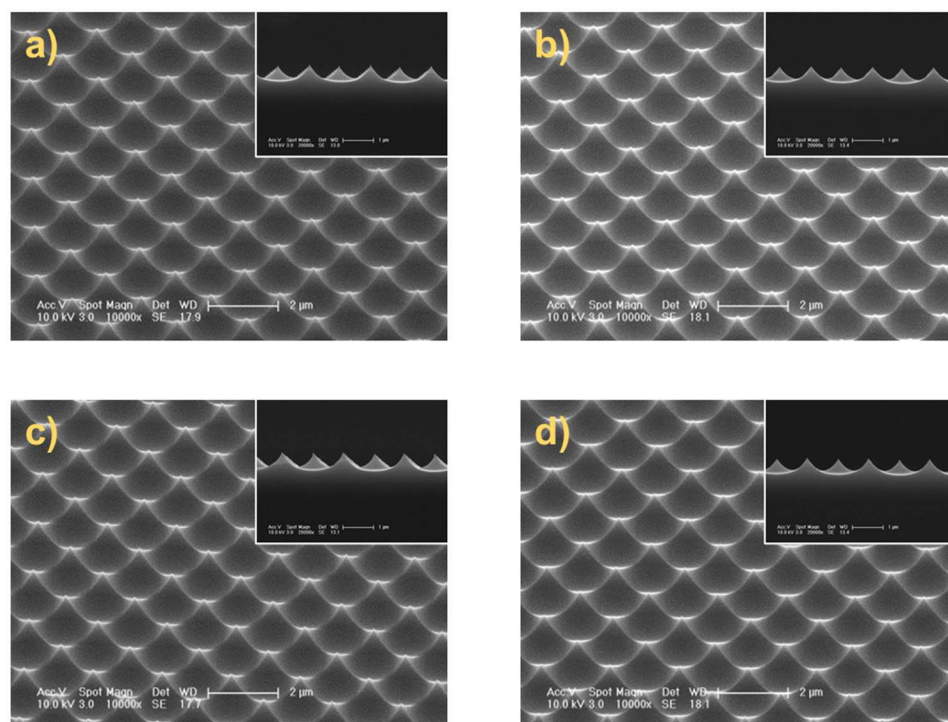

**Figure S3.** SEM images of an inverse moth-eye microstructure according to process pressure; (a) 25 mTorr, (b) 30 mTorr, (c) 40 mTorr and (d) 45 mTorr
